# Supplementary material for: Hybrid-dimensional magnetic microstructure based 3D substrates for remote controllable and ultrafast water remediation
Source: Royal Society of Chemistry journal article supplement (doi:10.1039/c5ta08723f), 2015-11-26
Supplement: c5ta08723f4.pdf [file c5ta08723f4.pdf]

## **Supporting Information for**

### **Hybrid-Dimensional Magnetic Microstructures on 3D Substrates for Remote-Control and Ultrafast Water Remediation**

*By Ran Du,<sup>a</sup> Qingliang Feng,<sup>ab</sup> Huaying Ren,<sup>ac</sup> Qiuchen Zhao,<sup>a</sup> Xin Gao,<sup>a</sup> and Jin Zhang<sup>\*,a</sup>*

<sup>a</sup>Center for Nanochemistry, Beijing National Laboratory for Molecular Sciences, Key Laboratory for the Physics and Chemistry of Nanodevices, State Key Laboratory for Structural Chemistry of Unstable and Stable Species, College of Chemistry and Molecular Engineering, Peking University, Beijing 100871, P.R. China.

<sup>b</sup>School of Chemistry and Chemical Engineering, Lanzhou University, Lanzhou 730000, P. R. China

<sup>c</sup>Academy for Advanced Interdisciplinary Studies, Peking University, Beijing 100871, China

## Figures

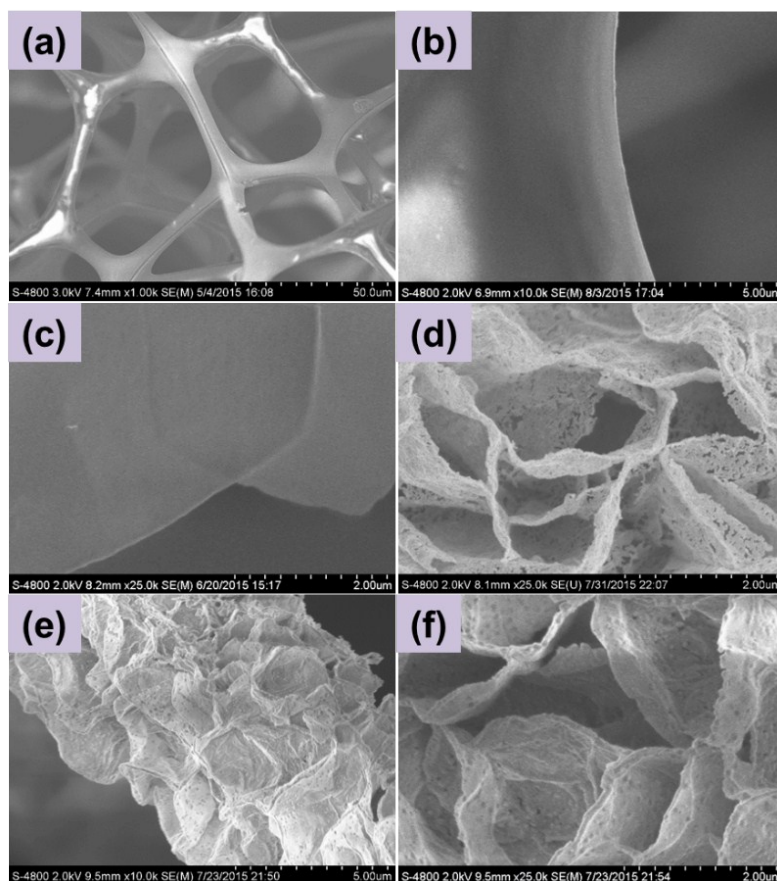

**Figure S1.** The SEM images of (a,b) pristine MF, (c) MF-C, (d) MMF, and (e,f) MM-RSF.

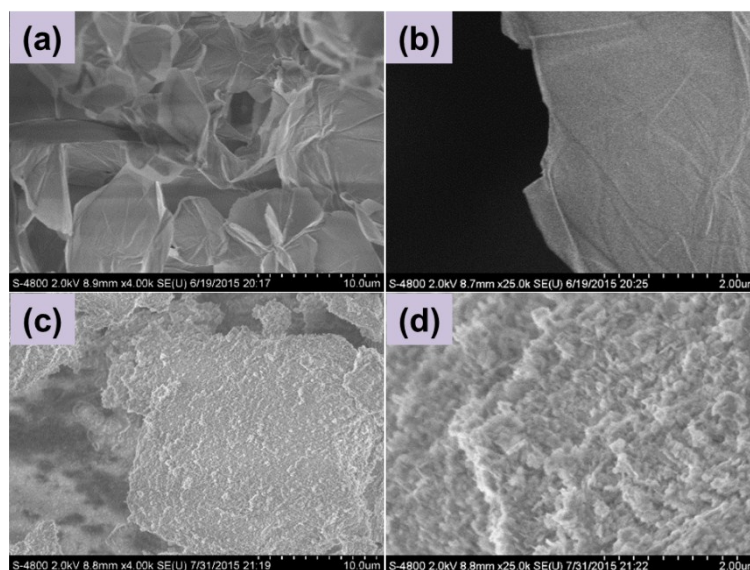

**Figure S2.** The SEM images of cobalt (II) hydroxide derived from (a,b) slowly precipitation by epichlorohydrin and (c,d) rapidly precipitation by KOH.

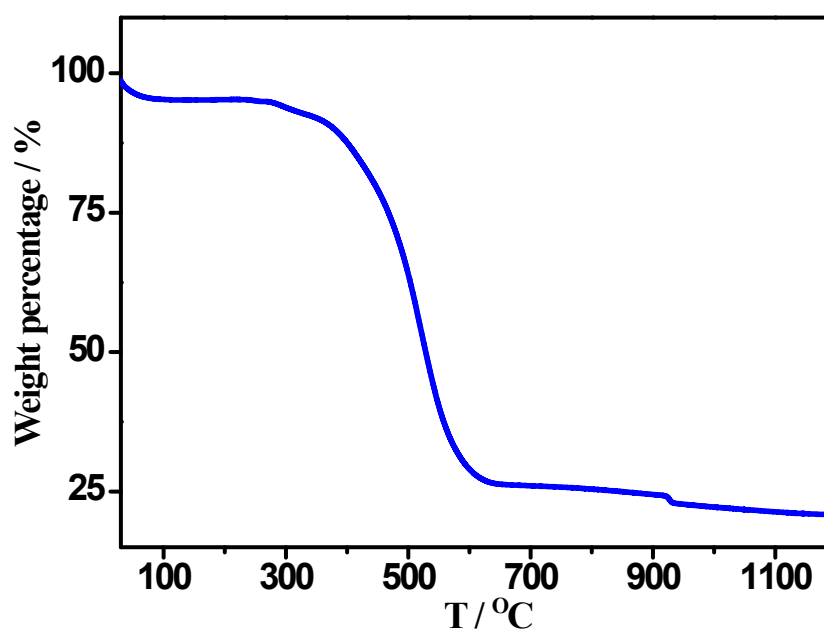

**Figure S3.** The TG curves of MMF in air, from room temperature to 1200 °C.

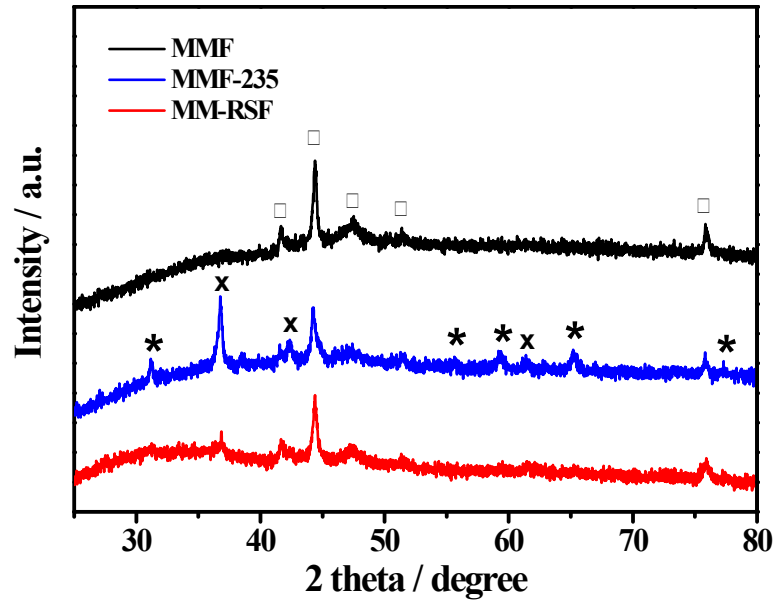

**Figure S4.** The powder XRD patterns of microstructures on MMF, MM-RSF, and MMF after heating alone in air (MMF-235). The “ $\Delta$ ”, “\*”, and “x” indicated the peak of cobalt,  $\text{Co}_3\text{O}_4$ , and  $\text{CoO}$ , respectively. The peaks were assigned according to the PDF#65-9722 and PDF#05-0727 (cobalt, hcp), PDF#15-0806 (cobalt, fcc), PDF#43-1003 ( $\text{Co}_3\text{O}_4$ ), and PDF#43-1004 ( $\text{CoO}$ ).

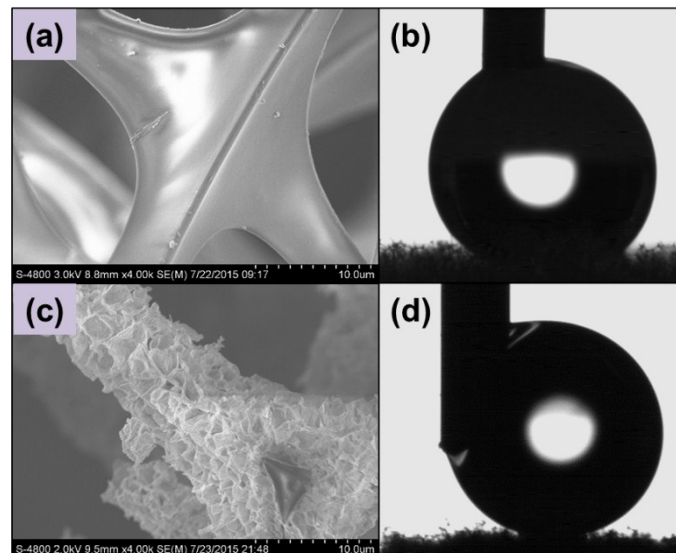

**Figure S5.** The SEM images and static water contact angle of (a,b) PDMS-coated MF and (c,d) MM-RSF.

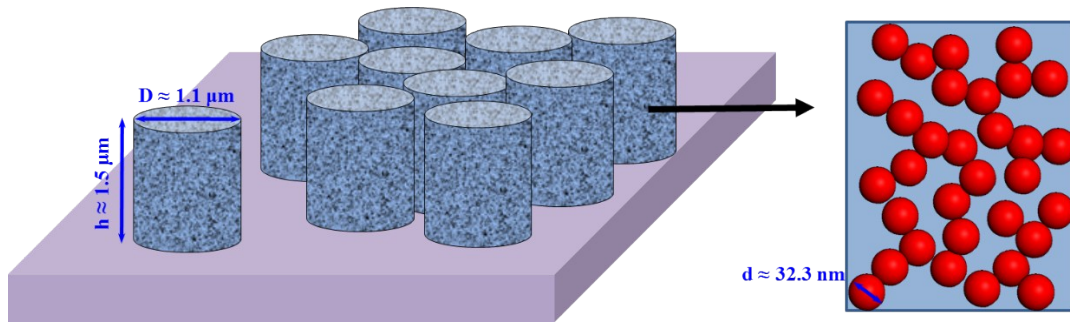

**Figure S6** The theoretical model of MM-RSF, representing the 0D/2D hierarchical micro/nano structures on the surface of melamine foam. The 2D sheets vertically and randomly stood on the foam surface and the sheet was composed of 0D cobalt nanoparticles. The 2D sheets are modeled as a series of hollow cylinders (the surface of adjacent cylinders merge together), and the nanoparticles are modeled as spheres.

Roughness is defined as the ratio of the actual area of a rough surface to the geometric projected area. Then the roughness  $R_f$  is calculated as follows:

The average size of microstructures were calculated from SEM or TEM images. Given that the average height, diameter and density of hollow cylinders are  $1.6 \mu\text{m}$ ,  $1.1 \mu\text{m}$ , and  $0.4 \mu\text{m}^{-2}$ , respectively. The average diameter and density of spheres are  $32.3 \text{ nm}$  and  $320 \mu\text{m}^{-2}$ , respectively.

Hypothesize the 2D sheet was flat, the  $A_0$ ,  $A_{\text{cylinder}}$  denote the projected area ( $1\mu\text{m}^2$ ) on the foam and the area provided by the flat hollow cylinders. Then the roughness of the foam (denoted as  $R_1$ ) can be calculated as follows,

$$R_1 = \frac{A_0 + A_{\text{cylinder}}}{A_0} = 1 + \frac{0.4 * \pi * 1.1 * 1.5}{1 * 1} = 3.07$$

Considering the 2D sheet as the substrate,  $A_s$ ,  $A_{\text{NPs}}$  denote the projected area ( $1\mu\text{m}^2$ ) on the sheet and the area provided by the spherical nanoparticles. Then the roughness of the sheet can be calculated as follows,

$$R_2 = \frac{A_s + A_{\text{NPs}}}{A_s} = 1 + \frac{320 * 4 * \pi * (0.0323 / 2)^2}{1 * 1} = 2.05$$

Therefore, the total roughness provided by the nanoparticles-composed sheets can be derived as follows

$$R_f = R_1 * R_2 = 3.07 * 2.05 = 6.29$$

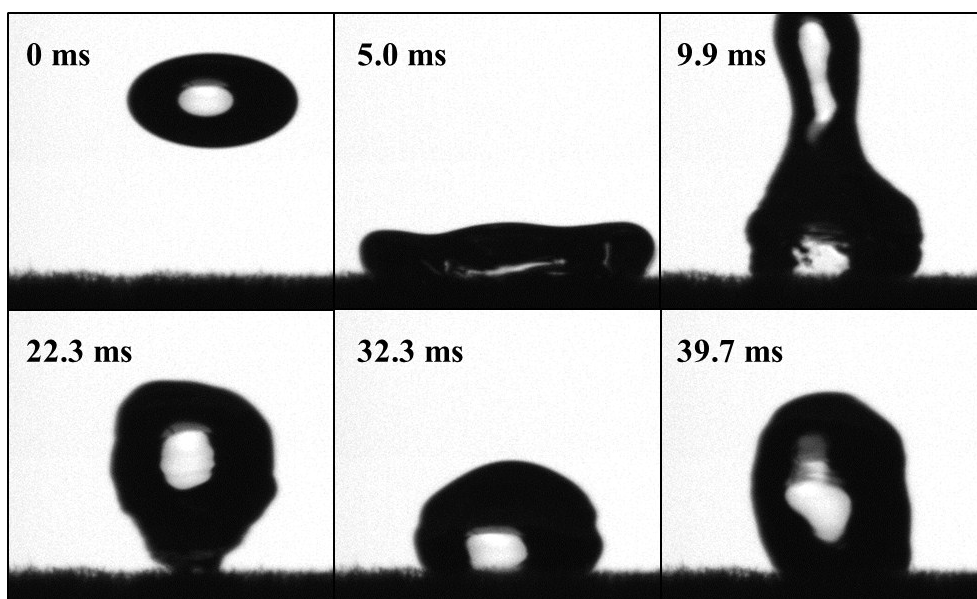

**Figure S7.** Snapshots of a water droplet impact on the surface of PDMS-coated MF.

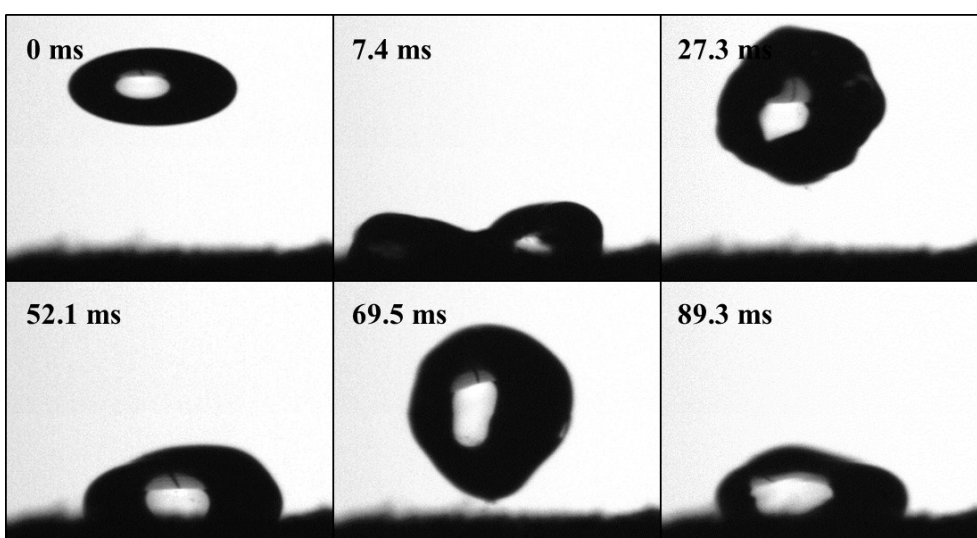

**Figure S8.** Snapshots of a water droplet impact on the surface of MM-RSF.

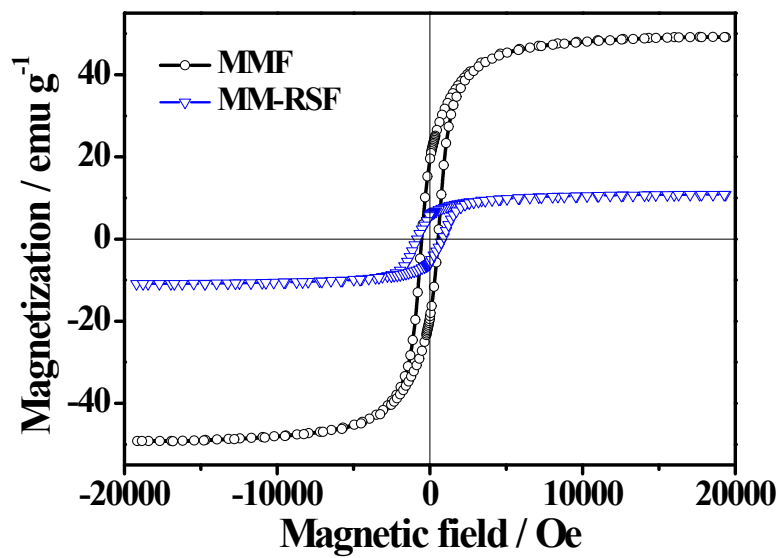

**Figure S9.** The magnetization curves of MMF and MM-RSF.

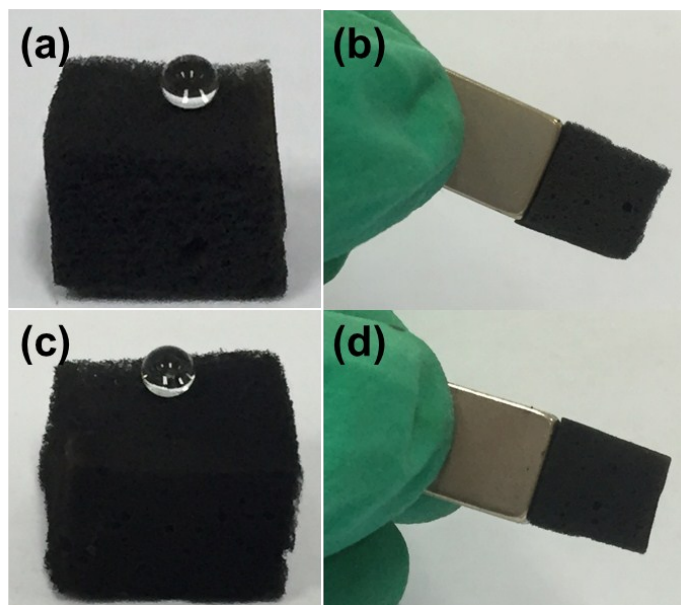

**Figure S10.** The demonstration of the hydrophobicity and magnetism retention of MM-RSF after (a-b) heating (200°C, 2h) in air and (c-d) cooling (-196°C, 2h) in liquid nitrogen.

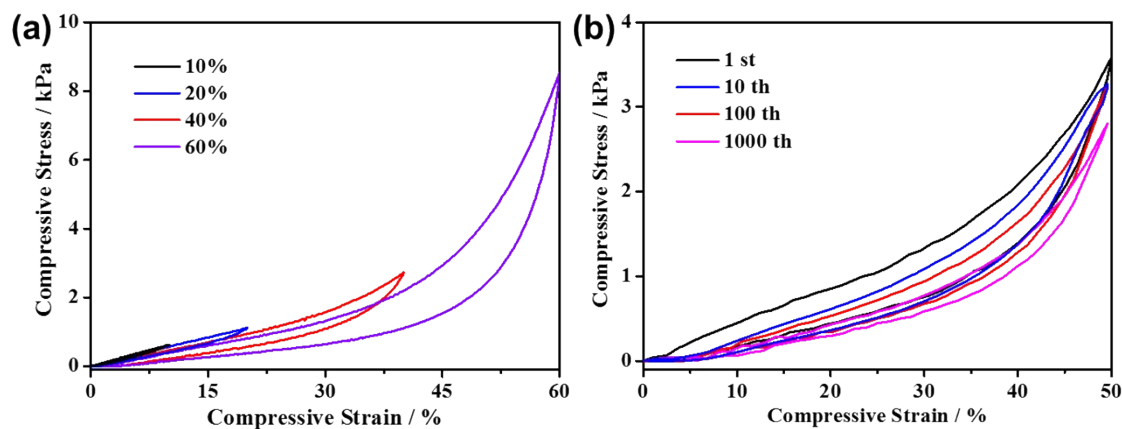

**Figure S11.** (a) The stress-strain curve of MM-RSF with different strain. (b) The cycling stress-strain curve of MM-RSF (1000 cycles) at 50% strain.

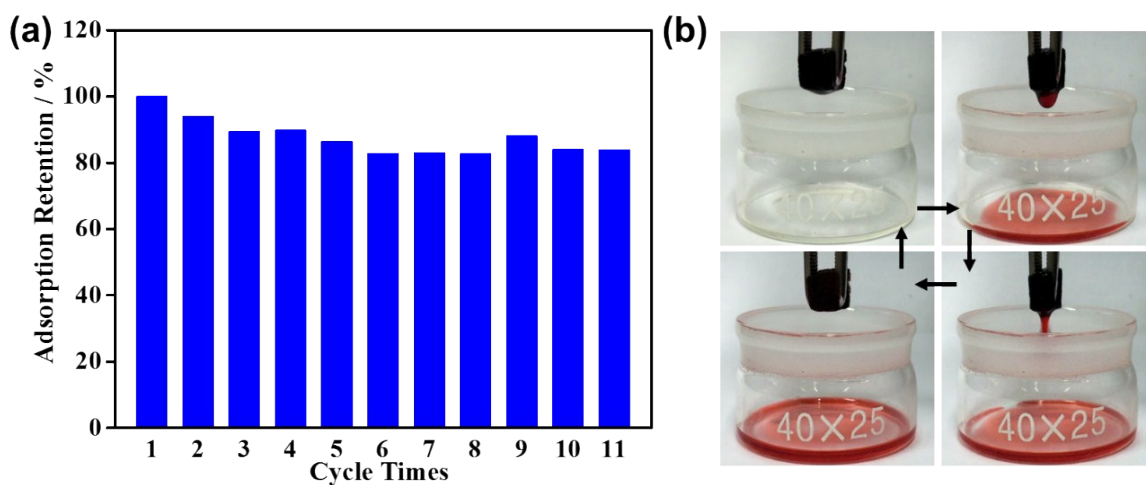

**Figure S12.** (a) The adsorption cycles of MM-RSF for acetone realized by squeezing regeneration. (b) The demonstration of oil recovery (toluene, dyed by Sudan III) by squeezing the saturated MM-RSF.

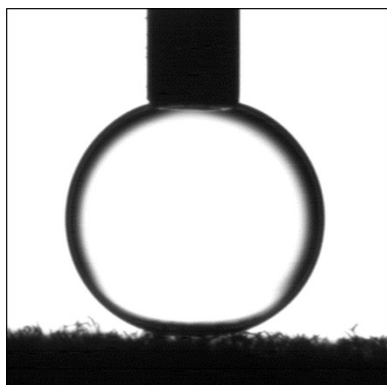

**Figure S13.** The water contact angle ( $164.2^\circ$ ) of MM-RSF in hexane.
